# Supplementary material for: Rational design of a neutral pH functional and stable organic photocathode
Source: Royal Society of Chemistry journal article supplement (doi:10.1039/c8cc01736k), 2018-01-01
Supplement: c8cc01736k1.pdf [file c8cc01736k1.pdf]

# Supplementary Information

## Rational design of a neutral pH functional and stable organic photocathode

Laia Francàs,<sup>‡<sup>a</sup>\*</sup> Eric Burns,<sup>‡<sup>a</sup></sup> Ludmilla Steier,<sup>a</sup> Hyojung Cha,<sup>a</sup> Lluís Solà-Hernández,<sup>b</sup> Xiaoe Li,<sup>a</sup> Pabitra Shakya Tuladhar,<sup>a</sup> Roger Bofill,<sup>b</sup> Jordi García-Antón,<sup>b</sup> Xavier Sala,<sup>b</sup> James R. Durrant <sup>a\*</sup>

Corresponding authors: [lfrancas@ic.ac.uk](mailto:lfrancas@ic.ac.uk); [j.durrant@imperial.ac.uk](mailto:j.durrant@imperial.ac.uk)

## 1. Experimental information:

### A. Chemicals and reagents

PC<sub>70</sub>BM was purchased from Solenne BV, PCDTBT from 1-Material, PEDOT:PSS from Heraeus, evaporator materials from Kurt J. Lesker company, ultrasonic solder (alloy #GS155) from Cerasolzer, and 5-minute epoxy resin from Devcon. RuO<sub>2</sub> nanoparticles were synthesized by hydrothermal synthesis following a reported procedure.<sup>1</sup> All other materials and reagents were purchased from Sigma-Aldrich.

### B. Device fabrication

Devices were prepared on cleaned ITO-glass substrates: ITO substrates were sonicated for 20 minutes in detergent water and followed by 3 sonicated washes of 5 minutes in DI water, 2 sonications of 5 minutes in acetone, and 1 sonication of 5 minutes in isopropanol. ITO-glass were then treated with an additional O<sub>2</sub> plasma treatment (8 min at 3 mbar O<sub>2</sub> at 155 W) immediately prior to device fabrication. OPV and OPV PEC devices were then constructed via subsequent spincoating/drying steps of different material layers. After each spincoated thin film, a narrow strip ~1 mm was removed using a complimentary solvent to reveal the ITO back contact as indicated in figure S1b. The final tested PEC devices were presenting an area between 0.6 to 0.7 cm<sup>2</sup>.

#### *NiO layer:*

Nickel oxide (NiO) HTL solution was prepared from 52 mg nickel(II) acetate tetrahydrate in 1ml methoxyethanol and 12μl ethanolamine and stirred overnight. The NiO solution was filtered through a 0.45 micron PTFE filter and spincoated directly onto clean ITO at a spin speed of 4000 rpm for 45 s. A thin strip of the deposited film was wiped clean using isopropanol as indicated in figure S1b. NiO layers were annealed at 250 °C for 20 min and post-treated with O<sub>2</sub> plasma immediately prior to BHJ film deposition (8 min at 3 mbar O<sub>2</sub> at 155 W) which serves to shift the work function deeper – towards the HOMO energy level of the donor polymer.<sup>1,2</sup>

#### *PEDOT:PSS layer*

PEDOT:PSS was filtered through a 0.45 micron PTFE filter and otherwise used as received. The PEDOT solution was spincoated at a spin speed of 3500 rpm for 45 s onto ITO-glass. A thin strip of the deposited film was wiped clean using DI water (as indicated in figure S1b) and the remaining film was subsequently annealed at 150 °C for 15 min.

#### *PCDTBT: PC<sub>70</sub>BM blend*

A solution of PCDTBT: PC<sub>70</sub>BM (1:2) 18 wt% in chlorobenzene was prepared and stirred for at least 12h before use. Note: the same solution may be kept over a period of several days under a stirred environment with no apparent loss in performance. The blend solution was spun onto the hole selective layer at a spin speed of 2000 rpm for 60 s with no post-treatment.<sup>3</sup> A thin strip was wiped clean with chloroform to reveal the ITO back contact as indicated in figure S1b.

#### *OPV fabrication:*

Organic photovoltaic devices had the following structure: ITO || NiO or PEDOT:PSS || PCDTBT: PC<sub>70</sub>BM || Ca (25 nm) || Al (150 nm)

Calcium and aluminium contacts were thermally evaporated as shown in Fig. S1c.

#### Photocathode fabrication:

Organic photocathode devices had the following structure: ITO || NiO or PEDOT:PSS || PCDTBT:PC<sub>70</sub>BM || Au (70-80 nm) or ALD TiO<sub>2</sub> (100 nm) || RuO<sub>2</sub> NP

Gold was thermally evaporated onto the middle of the OPV cells to give a cumulative pixel area of 1 cm<sup>2</sup> (Fig. S2a).

#### *Atomic layer deposition of TiO<sub>2</sub>:*

A layer of 100 nm TiO<sub>2</sub> was deposited via atomic layer deposition (ALD) in a home-built ALD reactor, at 75 °C hotplate temperature in exposure mode with pulse, hold and purge times of 0.015 s/10 s/60 s for H<sub>2</sub>O (held at room temperature) and 0.1 s/10 s/60 s for tetrakis(dimethylamino) titanium, (TDMAT, heated at 75 °C) with 10 sccm N<sub>2</sub> flow.<sup>4</sup> A growth rate of 0.7 Å per cycle on a Si wafer as measured by a reflectometer (F20, Filmetrics). To avoid polymer degradation, the chamber was cooled to 30 °C before inserting and removing the samples. The substrates were heated only after evacuating the chamber to ~0.3 mbar under inert N<sub>2</sub> (Carbagas, 99.999% pure) flow. A thin strip of thermal tape was applied to the top of the photocathode device to prevent TiO<sub>2</sub> deposition onto the ITO back contact as seen in figure S2c.

#### *RuO<sub>2</sub> deposition:*

RuO<sub>2</sub> nanoparticles were prepared through a hydrothermal method previously published (Figure S3).<sup>1</sup> RuO<sub>2</sub> nanoparticles were added to 1 ml methanol at concentration 10 mg/ml and stirred for 48 h to create a suspension. 30 µl of the RuO<sub>2</sub> nanoparticles solution were spin-coated onto TiO<sub>2</sub>- or Au-coated devices at 4000 rpm for 40 s. A thin wire soldered to the ITO back contact via ultrasonic soldering and the final device was encapsulated around the edges with epoxy such that only the solution-OPV interface layer was exposed to the electrolyte (Fig. S2b). The catalyst after deposition on top of our photocathode was activated by performing several LSV under 1 sun illumination (Figure S11).

### **C. Instrumentation:**

XRD patterns of the samples were recorded at the “Servei de Difracció de Raigs X” at the UAB using a Phillips XPert diffractometer equipped with a two circle diffractometers and a Cu tube.

Transmission electron microscopy observations were performed at the “Servei de Microscòpia” of the UAB. TEM grids were prepared by drop-casting of the crude colloidal solution onto a holey carbon-coated copper grid. TEM analyses were performed on a JEOL 2011 electron microscope working at 200 kV with a point resolution of 1.8 Å. Statistical size distributions were built via manual analysis of enlarged micrographs by measuring ca. 200 non-touching nanoparticles. The analyses were done by assuming that the nanoparticles are spherical. Nanoparticle sizes are quoted as the mean diameter ± the standard deviation.

Solar cell performance was evaluated under xenon lamp with AM 1.5G filters at 1 sun referenced to a certified silicon diode.

All photocathode electrochemical measurements were carried out in a cappuccino cell in a three-electrode configuration using an Ag/AgCl (sat'd KCl) as a reference, a Pt mesh as a counter and the photocathode as the working electrode in 0.1 M phosphate buffer (pH 7) or 0.1 M sulfuric acid (pH 1). Linear sweep voltammetry and chronoamperometry measurements were carried out with an Autolab PGSTAT101 potentiostat under simulated AM 1.5G illumination (1 sun calibrated with a certified Si diode using a KG3 filter).

Hydrogen evolution measurements were performed in a gas tight three electrode electrochemical cell with the best performing photocathode applying 0 V vs RHE under 1 sun back illumination. The hydrogen was detected using a gas-phase Clark-type hydrogen electrode (Unisense H<sub>2</sub>-NP microsensor). Quantification of the evolved gas was done by adding known volumes of hydrogen.

#### D. Faradaic efficiency calculations

The Faradaic efficiency has been estimated as follows:

$$FE = \frac{\text{moles of gas phase H}_2 + \text{moles of dissolved H}_2}{\text{moles of H}_2 \text{ calculated from the photocurrent}} \times 100$$

Moles in the gas phase were directly estimated from the H<sub>2</sub> clark measurement = 7.76 10<sup>-6</sup> H<sub>2</sub> moles

Moles of dissolved H<sub>2</sub>:

$$[H_2] = \frac{P}{K_H}$$

Where K<sub>H</sub> (Henry constant) = 1282.05  $\frac{L \times atm}{mol}$ , and P is the pressure in the head space of the cell

P was estimated using the ideal gases law:

$$P = \frac{\text{moles H}_2 \times R \times T}{\text{Volume}} = \frac{7.76 \times 10^{-6} (\text{moles}) \times 0.082 \left( \frac{L \times atm}{K \times mol} \right) \times 298 (K)}{5.2 \times 10^{-3} (L)} = 0.0365 \text{ atm}$$

$$[H_2] = \frac{P}{K_H} = \frac{0.0365 (\text{atm})}{1282.05 \left( \frac{L \times atm}{\text{mole}} \right)} = 2.85 \times 10^{-5} \frac{\text{mole}}{L}$$

This concentration was in a 55 mL of aqueous solution, so 1.566 x 10<sup>-6</sup> moles of H<sub>2</sub> were dissolved in the solution

From the monitored photocurrent we know that we have accumulated 15.55 coulombs which corresponds to 8.06 x 10<sup>-5</sup> moles of H<sub>2</sub>

$$FE = \frac{7.76 \times 10^{-5} + 1.566 \times 10^{-6} \text{ moles of H}_2}{8.06 \times 10^{-5}} \times 100 = 98 \%$$

## 2. Tables and Figures

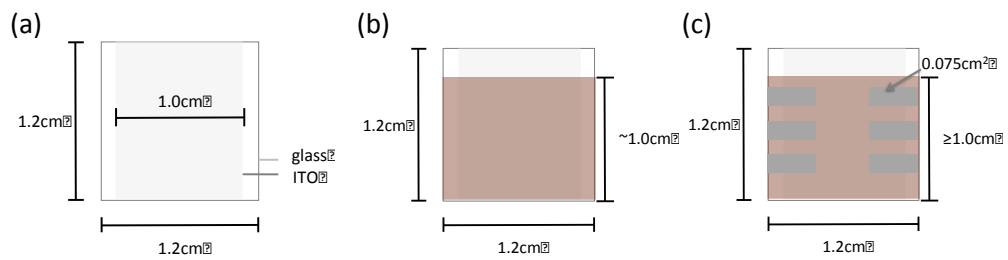

**Figure S1.** (a) Typical ITO glass slide used in this work. (b) Device with absorber blend. In case of the organic photocathode, the ALD TiO<sub>2</sub> layer would cover the same absorber area. (c) OPV device after calcium and aluminum thermal evaporation.

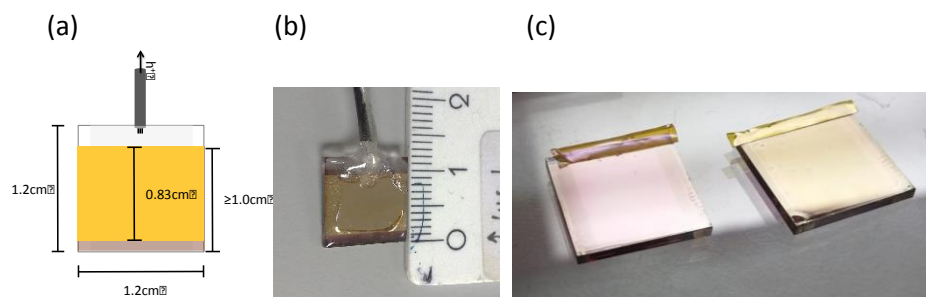

**Figure S2.** (a) Photocathode after thermal evaporation of gold. (b) Photograph of a photocathode device coated with Au and RuO<sub>2</sub> nanoparticles. (c) Photograph of photocathode device coated without (left) and with (right) TiO<sub>2</sub>-ALD.

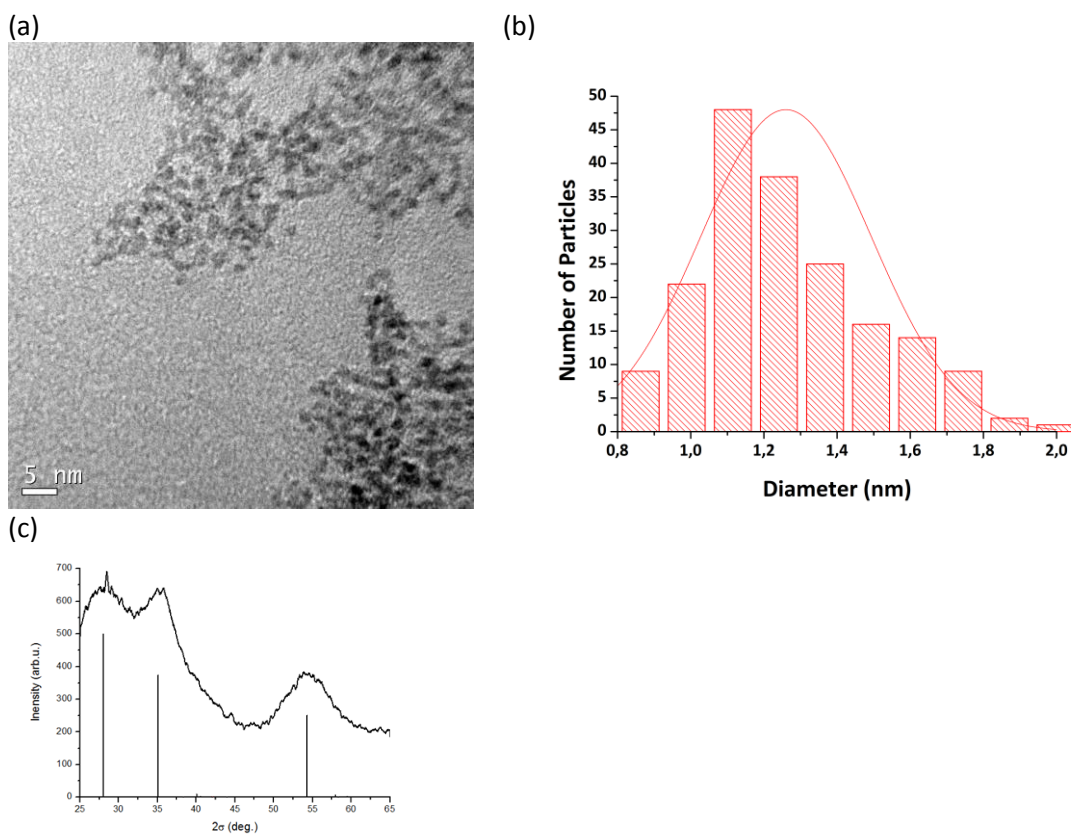

**Figure S3.** RuO<sub>2</sub>-NP characterisation. (a) TEM image (b) size distribution histogram and (c) powder XRD diffractogram with RuO<sub>2</sub> theoretical pattern. The presented experiments show the rutile RuO<sub>2</sub> nature of the as synthesised  $1.3 \pm 0.3$  nm nanoparticles.

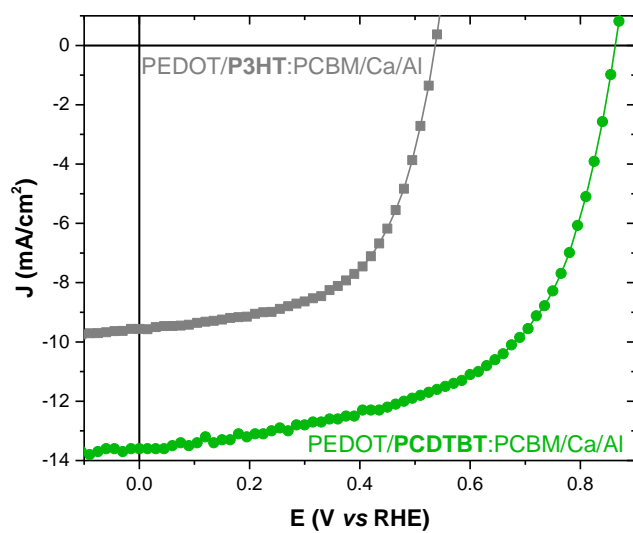

**Figure S4.** J-V curves for the conventional solar cell devices using P3HT:PCBM (grey) or PCDTBT (green).

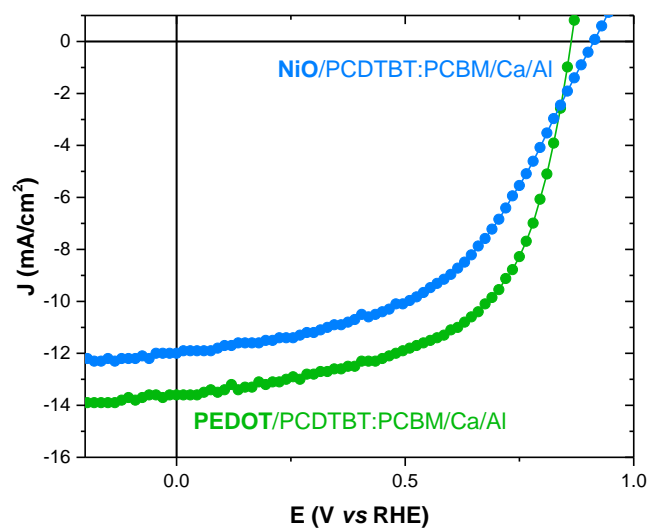

**Figure S5.** J-V curves for the conventional solar cell devices using PEDOT/PCDTBT:PCBM (green) or NiO/PCDTBT:PCBM (blue).

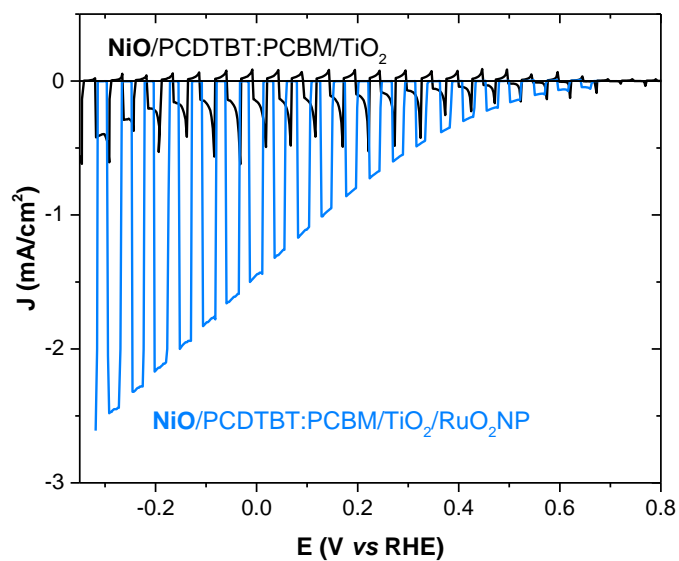

**Figure S6.** J-V curves at pH 7 using photocathodes with the conformation NiO/PCDTBT:PCBM/TiO<sub>2</sub> (black trace) and NiO/PCDTBT:PCBM/TiO<sub>2</sub>/RuO<sub>2</sub>-NP (blue trace) using back illumination (Area = 0.7 cm<sup>2</sup>).

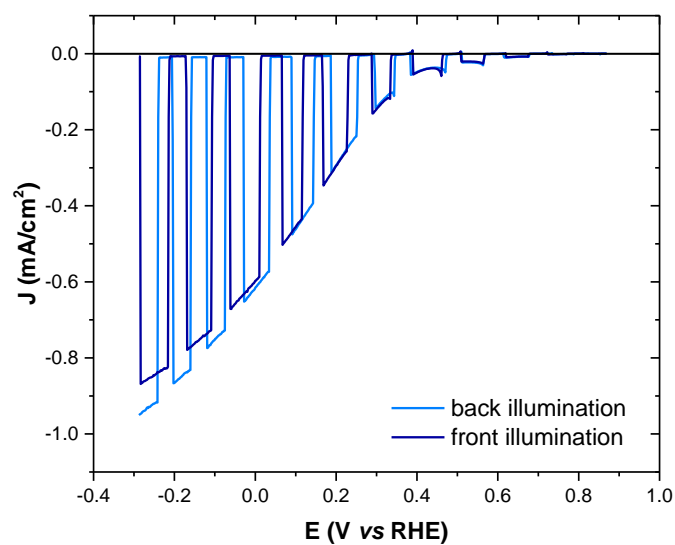

**Figure S7.** J-V curves at pH 7 using photocathodes with the conformation NiO/PCDTBT:PCBM/TiO<sub>2</sub>/RuO<sub>2</sub>-NP using front and back illumination (Area = 0.6 cm<sup>2</sup>).

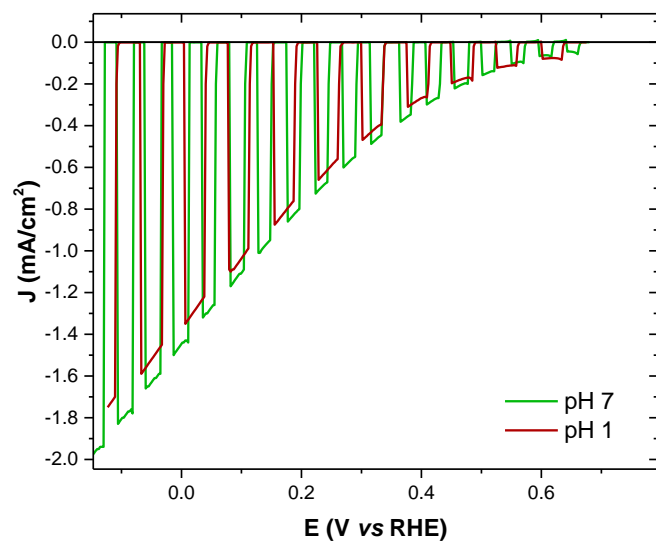

**Figure S8.** J-V curves using NiO/PCDTBT:PCBM/TiO<sub>2</sub>/RuO<sub>2</sub>-NP as a photocathode at pH 1 (red) and pH 7 (green), back illumination (Area = 0.7 cm<sup>2</sup>).



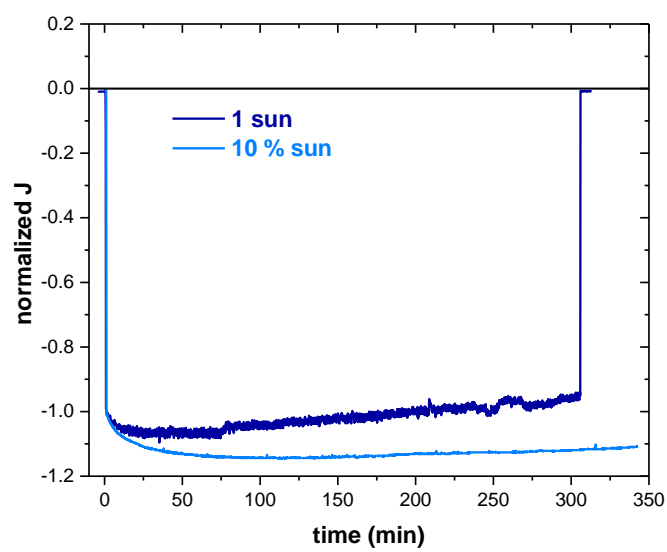

**Figure S9.** Bulk electrolysis at 0 V vs RHE at 1 sun (dark blue) and 10% of a sun (light blue) (Area = 0.7 cm<sup>2</sup>).

(a)

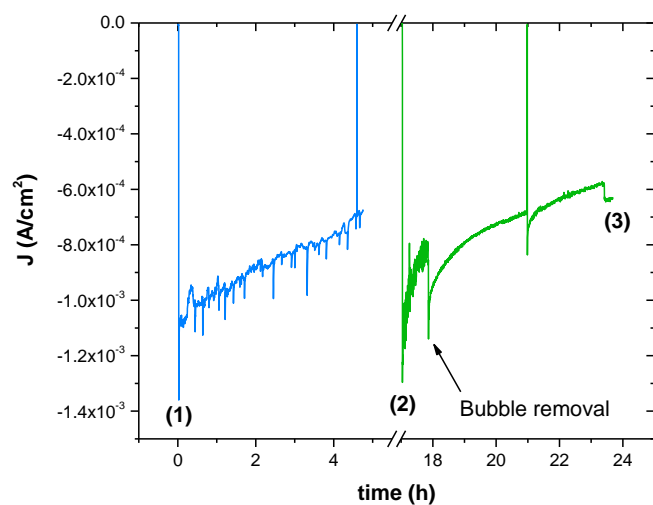

(b)

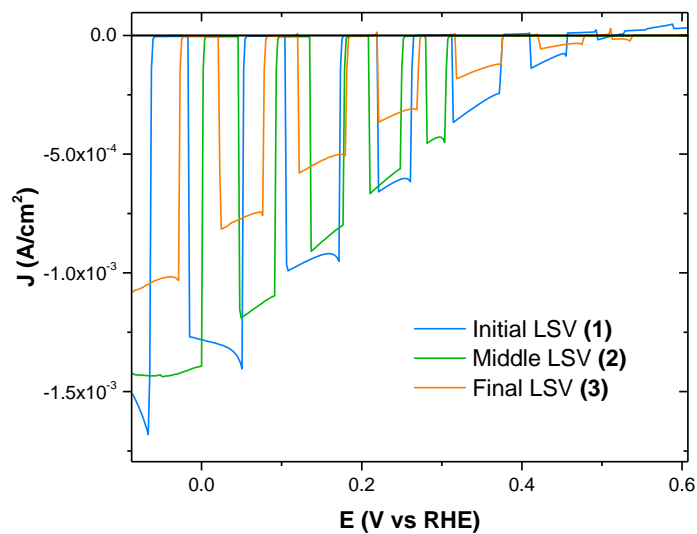

**Figure S10.** Long term bulk electrolysis experiment performed with a NiO/PCDTBT:PCBM/TiO<sub>2</sub>/RuO<sub>2</sub>-NP [2] at 0 V vs RHE at 1 sun. (a) Current density vs time during two consecutive 5 h bulk electrolysis, 1-5 hours (light blue) and 5-10 hours (green). (b) LSV before the experiment (light blue), after 5 h of bulk electrolysis (green) and after 10 h of bulk electrolysis (orange). The initial 5 hours decay can be associated with bubble formation, as indicated by the lack of deactivation measured by the LSV before (light blue) and after (green) this first 5 hours of bulk electrolysis. In the next 5 hours of electrolysis (green) the decay of performance is due to some deactivation of the system and is around 20%. (area 0.7 cm<sup>2</sup>).

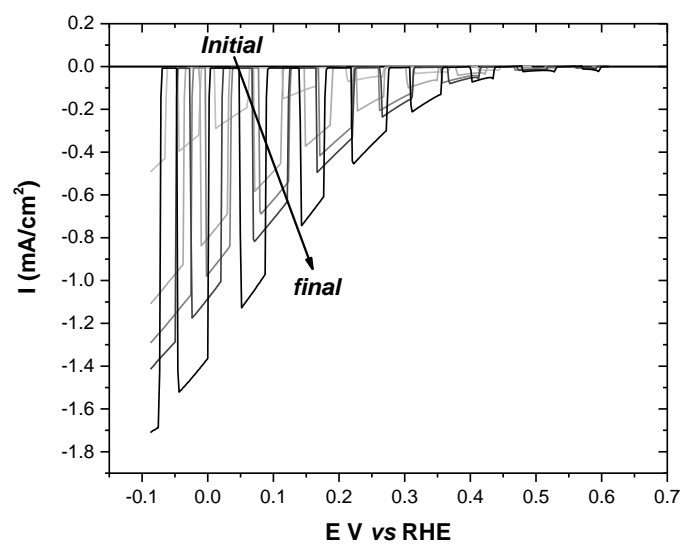

**Figure S11.** Activation process of NiO/PCDTBT:PCBM/TiO<sub>2</sub>/RuO<sub>2</sub>-NP by performing J-V curves at pH 7, back illumination. (Area = 0.7 cm<sup>2</sup>).

**Table S1:** Literature review on organic photocathodes.

| Entry | HTL                             | Active Layer              | ETL                   | Catalyst             | Stability                                  | Current Onset (vs RHE) | Current (mA/cm <sup>2</sup> ) 0 RHE | pH   | Ref          |
|-------|---------------------------------|---------------------------|-----------------------|----------------------|--------------------------------------------|------------------------|-------------------------------------|------|--------------|
| 1     | NiO                             | PCDTBT:PCBM               | ALD-TiO <sub>2</sub>  | RuO <sub>2</sub> -NP | -10 % in 5 hours (@ 0 vs RHE)              | 0.67                   | 1.4                                 | 7    | In this work |
| 2     | PEDOT                           | PCDTBT:PCBM               | ALD-TiO <sub>2</sub>  | RuO <sub>2</sub> -NP | 95 % in 90 min (@ 0 V vs RHE)              | 0.67                   | 2.9                                 | 7    | In this work |
| 3     | CuI                             | P3HT:PC <sub>60</sub> BM  | TiO <sub>2</sub> -ALD | RuOx                 | 3.5 hours (@ 0 V vs RHE)                   | 0.5                    | 3                                   | 5    | 6            |
| 4     | CuI                             | P3HT:PC <sub>60</sub> BM  | TiO <sub>2</sub> -PEI | Pt                   | -40% in 40 min (@ 0 vs RHE)                | 0.60                   | 5.25                                | 1.0  | 7            |
| 5     | p-MoS <sub>2</sub>              | P3HT:PC <sub>60</sub> BM  | TiO <sub>2</sub>      | MoS <sub>3</sub>     | -50% in 5 min (@ 0 vs RHE)                 | 0.56                   | 1.21                                | 1.0  | 8            |
| 6     | WO <sub>3</sub>                 | P3HT:PC <sub>60</sub> BM  | TiO <sub>2</sub>      | Pt                   | -30% peak in 8h (@ 0.20 vs RHE)            | 0.56                   | 2.48                                | 1.4  | 9            |
| 7     | PEDOT:PSS                       | P3HT:PC <sub>60</sub> BM  |                       | MoS <sub>3</sub>     | -100% <15 min (@ 0 vs RHE) <sup>a</sup>    | -0.15                  | 0.05                                | 2    | 10           |
| 8     |                                 | P3HT:PC <sub>60</sub> BM  |                       | MoS <sub>3</sub>     | NA                                         | 0.19                   | 0.6                                 | 2    | 10           |
| 9     | rGO                             | P3HT:PC <sub>60</sub> BM  |                       | MoS <sub>3</sub>     | No loss in 1h                              | 0.20                   | 0.7                                 | 2    | 10           |
| 10    | NiO <sub>x</sub><br>(sol. gel.) | P3HT:PC <sub>60</sub> BM  |                       | MoS <sub>3</sub>     | +100% in 1h (@ 0 vs RHE) <sup>b</sup>      | 0.34                   | 1.3                                 | 2    | 10           |
| 11    | MoO <sub>x</sub><br>(sol. gel.) | P3HT:PC <sub>60</sub> BM  |                       | MoS <sub>3</sub>     | -20% in 1h (@ 0 vs RHE)                    | 0.41                   | 2.2                                 | 2    | 10           |
| 12    | PEDOT:PSS                       | α-6T/SubPc                | C <sub>60</sub>       | MoS <sub>3</sub>     | -90% in 5min (@ 0 vs RHE)                  |                        |                                     | 0-1  | 11           |
| 13    | PEDOT:PSS                       | α-6T/SubNc                | C <sub>60</sub>       | MoS <sub>3</sub>     | -30% in 5min (@ 0 vs RHE)                  | 0.69                   | 3.6                                 | 0-1  | 11           |
| 14    | PEDOT:PSS                       | α-6T/<br>SubNc/SubPc      | C <sub>60</sub>       | MoS <sub>3</sub>     | -70% in 5min (@ 0 vs RHE)                  | 0.70                   | 1.5                                 | 0-1  | 11           |
| 15    | PEDOT:PSS                       | α-6T/α-6T:<br>SubNc/SubNc | C <sub>60</sub>       | MoS <sub>3</sub>     | -90% in 5min (@ 0 vs RHE)                  | 0.68                   | 2.4                                 | 0-1  | 11           |
| 16    | MoO <sub>3</sub>                | P3HT:PC <sub>60</sub> BM  | TiO <sub>2</sub>      | Pt                   | -80% in 30min (@ 0.18 vs RHE)              | ~0.6                   | ~1.5                                | 1.37 | 12           |
| 17    |                                 | P3HT:PC <sub>60</sub> BM  | TiO <sub>2</sub>      | Pt                   | No loss in 100min <sup>c,d</sup>           |                        |                                     | 1.37 | 13           |
| 18    | MoO <sub>3</sub>                | P3HT:PC <sub>60</sub> BM  | TiO <sub>2</sub>      | Pt                   | -90% in 100min (@ 0 vs RHE) <sup>c,e</sup> | ~0.55                  | ~3                                  | 1.37 | 13           |
| 19    | CuI                             | P3HT:PC <sub>60</sub> BM  | TiO <sub>2</sub>      | Pt                   | -60% in 20min                              | 0.72                   | ~8                                  | 1    | 14           |

|    |                   |                                             |                                                         |                                   |                                                  |       |                         |      |    |
|----|-------------------|---------------------------------------------|---------------------------------------------------------|-----------------------------------|--------------------------------------------------|-------|-------------------------|------|----|
|    |                   |                                             |                                                         |                                   | (@ 0 vs RHE)                                     |       |                         |      |    |
| 20 | PANI              | P3HT:PC <sub>60</sub> BM                    |                                                         |                                   | -70% in 1h                                       | 0.1   | 0.3                     | 2    | 15 |
|    |                   |                                             |                                                         |                                   | (@ 0 vs RHE)                                     |       |                         |      |    |
| 21 | PEDOT:PSS         | P3HT:PC <sub>60</sub> BM                    | AZO                                                     | C-Pt                              | -60% in 1h                                       | ~0.25 | ~1.2                    | 7    | 16 |
| 22 | PEDOT:PSS         | P3HT:PC <sub>60</sub> BM                    | LiF/Al<br>(evap)                                        | Ti- MoS <sub>3</sub>              | -45% in 10 min<br>(@ 0 vs RHE) <sup>a</sup>      | 0.48  | 8.47                    | 0-1  | 17 |
| 23 | PEDOT:PSS         | P3HT:PC <sub>60</sub> BM                    | LiF/Al<br>(evap)                                        | Ti-Pt/C                           | NA                                               | 0.67  | 7.87                    | 0-1  | 17 |
| 24 | PEDOT:PSS         | P3HT:PC <sub>60</sub> BM                    |                                                         | Ti- MoS <sub>3</sub>              | -12% in 10 min (@ 0<br>vs RHE) <sup>a</sup>      | 0.32  | 6.81                    | 0-1  | 17 |
| 25 | PEDOT:PSS         | P3HT:PC <sub>60</sub> BM                    | C <sub>60</sub>                                         | C <sub>60</sub> -MoS <sub>3</sub> | -60% in ~1 min<br>(@ 0 vs RHE) <sup>a</sup>      | 0.24  | 0.86                    | 0-1  | 17 |
| 26 | Crosslinked-PEDOT | P3HT:PC <sub>60</sub> BM                    | TiO <sub>x</sub> (sol.gel)                              | Platinum                          | No loss >3h                                      | >0.2  | <0.4                    | 2    | 18 |
| 27 |                   | P3HT                                        |                                                         | Pt                                | NA                                               | ~0.24 | ~0.04                   | ~1   | 19 |
| 28 | PEDOT:PSS         | P3HT                                        | C <sub>60</sub>                                         | Co-N <sub>3</sub>                 | Stable 1h                                        | >0.3  | ~0.002                  | 4.5  | 20 |
| 29 | Au                | CdSe:P3HT                                   |                                                         | Pt                                | -50% in 5h                                       | ~0.8  | 1.2                     | 7    | 21 |
| 30 |                   | ZnPc/C <sub>60</sub> (bilayer)              |                                                         | Pt                                |                                                  | ~0    | Negligible              | 2    | 22 |
| 31 |                   | P3HT                                        |                                                         |                                   | No observed<br>photocurrent<br>degradation-hours |       | ~0.015                  | 1    | 23 |
| 32 | PEDOT:PSS         | P3HT:PC <sub>60</sub> BM                    | MoS <sub>3</sub><br>(np. suspension)                    | MoS <sub>3</sub>                  | -50% in 45 min (@<br>0.16 vs RHE) <sup>a</sup>   | 0.25  | 0.05                    | ~0   | 24 |
| 33 | PEDOT:PSS         | P3HT:PC <sub>60</sub> BM                    | TiO <sub>2</sub><br>(np. suspension)                    |                                   | NA                                               | 0.45  | ~0.1                    | ~0   | 24 |
| 34 | PEDOT:PSS         | P3HT:PC <sub>60</sub> BM                    | TiO <sub>2</sub> / MoS <sub>3</sub> (np.<br>suspension) | MoS <sub>3</sub>                  | -30% in 45 min (@<br>0.16 vs RHE) <sup>a</sup>   | 0.45  | ~0.2                    | ~0   | 24 |
| 35 |                   | H <sub>2</sub> Pc:C <sub>60</sub> (bilayer) |                                                         | Pt                                | NA                                               | ~0.3  | ~0.05                   | 2    | 25 |
| 36 |                   | P3HT: Dy@C <sub>82</sub>                    |                                                         |                                   | Stable over 1h<br>(@ OCP)                        | ~0.7  | ~0.012                  | 6.5  | 26 |
| 37 |                   | P3HT: Dy@C <sub>82</sub>                    |                                                         |                                   | Stable over 1h<br>(@ OCP)                        | ~0.6  | ~0.008 <sup>e</sup>     | ~6.5 | 27 |
| 38 |                   | P3HT                                        |                                                         |                                   | -10% over 2h                                     | ~0.1  | Negligible <sup>e</sup> | 4.0  | 28 |
| 39 |                   | Poly(pyrrole)                               |                                                         |                                   |                                                  | ~0.2  | ~0.002                  | ~2   | 29 |

<sup>a</sup>Only surface of photocathode in contact with water. <sup>b</sup>Performance increases in first few minutes and then plateaus <sup>c</sup>Performance first increases and then decreases <sup>d</sup>-50% in 90min from peak. <sup>e</sup>monochromatic light.

## F. References:

1. K.-H. Chang and C.-C. Hu, *Electrochem. Solid-State Lett*, 2004, **7**, A466-A469.
2. S. Wheeler, F. Deledalle, N. Tokmoldin, T. Kirchartz, J. Nelson and J. R. Durrant, *Phys. Rev. Appl.*, 2015, **4**, 024020.
3. S. R. Cowan, J. V. Li, D. C. Olson and E. L. Ratcliff, *Adv. Energy Mater.*, 2015, **5**, 1400549.
4. H. Cheng Wong, Z. Li, C. Hong Tan, H. Zhong, Z. Huang, H. Bronstein, I. McCulloch, ao T. Cabral and J. R. Durrant, *ACS Nano*, 2014, **8**, 1297-1308.
5. L. Steier, J. Luo, M. Schreier, M. T. Mayer, T. Sajavaara and M. Grätzel, *ACS Nano*, 2015, **9**, 11775–11783.
6. L. Steier, S. Bellani, H. C. Rojas, L. Pan, M. Laitinen, T. Sajavaara, F. Di Fonzo, M. Grätzel, M. R. Antognazza and M. T. Mayer, *Sustain. Energy Fuels*, 2017, 1915–1920.
7. H. C. Rojas, S. Bellani, E. A. Sarduy, F. Fumagalli, M. T. Mayer, M. Schreier, M. Grätzel, F. Di Fonzo and M. R. Antognazza, *ACS Omega*, 2017, **2**, 3424–3431.
8. S. Bellani, L. Najafi, A. Capasso, A. E. Del Rio Castillo, M. R. Antognazza and F. Bonaccorso, *J. Mater. Chem. A*, 2017, **5**, 4384–4396.
9. A. Mezzetti, F. Fumagalli, A. Alfano, D. Iadicicco, M. R. Antognazza and F. di Fonzo, *Faraday Discuss.*, 2017, **198**, 433–448.
10. T. Bourgeteau, D. Tondelier, B. Geffroy, R. Brisse, S. Campidelli, R. Cornut and B. Jusselme, *J. Mater. Chem. A*, 2016, **4**, 4831–4839.
11. A. Morozan, T. Bourgeteau, D. Tondelier, B. Geffroy, B. Jusselme and V. Artero, *Nanotechnology*, 2016, **27**.
12. A. Ghadirzadeh, F. Fumagalli, A. Mezzetti, S. Bellani, L. Meda, M. R. Antognazza and F. Di Fonzo, *ChemPhotoChem*, 2018, **2**, 1-11.
13. F. Fumagalli, S. Bellani, M. Schreier, S. Leonardi, H. C. Rojas, A. Ghadirzadeh, G. Tullii, A. Savoini, G. Marra, L. Meda, M. Grätzel, G. Lanzani, M. T. Mayer, M. R. Antognazza and F. Di Fonzo, *J. Mater. Chem. A*, 2016, **4**, 2178–2187.
14. H. C. Rojas, S. Bellani, F. Fumagalli, G. Tullii, S. Leonardi, M. T. Mayer, M. Schreier, M. Grä, G. Lanzani, F. Di Fonzo and M. R. Antognazza, *Energ. Environ. Sci.* 2016, **9**, 3710.
15. E. Belarbi, V. M. Blas-Ferrando, M. Haro, H. Maghraoui-Meherzi and S. Gimenez, *Chem. Eng. Sci.*, 2016, **154**, 143-149.
16. M. Haro, C. Solis, V. M. Blas-Ferrando, O. Margeat, S. Ben Dhkil, C. Videlot-Ackermann, J. Ackermann, F. Di Fonzo, A. Guerrero and S. Gimenez, *ChemSusChem*, 2016, **9**, 3062–3066.
17. T. Bourgeteau, D. Tondelier, B. Geffroy, R. Brisse, R. Cornut, V. Artero and B. Jusselme, *ACS Appl. Mater. Interfaces*, 2015, **7**, 16395-16403.
18. M. Haro, C. Solis, G. Molina, L. Otero, J. Bisquert, S. Gimenez and A. Guerrero, *J. Phys. Chem. C*, 2015, **119**, 6488-6494.
19. G. M. Suppes, P. J. Fortin and S. Holdcroft, *J. Electrochem. Soc.*, 2015, **162**, H551–H556.
20. Y. Chen, H. Chen and H. Tian, *Chem. Commun.*, 2015, **51**, 11508–11511.
21. L.-H. Lai, W. Gomulya, M. Berghuis, L. Protesescu, R. J. Detz, J. N. H. Reek, M. V. Kovalenko and M. a.

- Loi, *ACS Appl. Mater. Interfaces*, 2015, **7**, 19083–19090.
- 22 T. Abe, Y. Hiyama, K. Fukui, K. Sahashi and K. Nagai, *Int. J. Hydrogen Energy*, 2015, **40**, 9165–9170.
- 23 G. Suppes, E. Ballard and S. Holdcroft, 2013, **4**, 5345-5350.
- 24 T. Bourgeteau, D. Tondelier, B. Geffroy, R. Brisse, C. Laberty-Robert, S. Campidelli, R. de Bettignies, V. Artero, S. Palacin and B. Jusselme, *Energy. Sustain. Soc.*, 2013, **6**, 2706–2713.
- 25 T. Abe, S. Tobinai, N. Taira, J. Chiba, T. Itoh and K. Nagai, *J. Phys. Chem. C*, 2011, **115**, 7701–7705.
- 26 S. Yang, L. Fan and S. Yang, *J. Phys. Chem. B*, 2004, **108**, 4394-4404.
- 27 S. Yang, L. Fan and S. Yang, *Chem. Phys. Lett.*, 2004, **388**, 253-258.
- 28 O. A. El-Rashiedy and S. Holdcroft, *J. Phys. Chem.* 1996, **100**, 5481-5484.
- 29 M. Kaneko, K. Okuzumi and A. Yamada, *J. Electroanal. Chem. Interfacial Electrochem.*, 1985, **183**, 407–410.
